# Supplementary material for: Strongly reduced lattice thermal conductivity in Sn-doped rare-earth (M) filled skutterudites MxCo4Sb12−ySny, promoted by Sb–Sn disordering and phase segregation
Source: Royal Society of Chemistry journal article supplement (doi:10.1039/d1ra04270j), 2021-01-01
Supplement: d1ra04270j1.pdf [file d1ra04270j1.pdf]

## SUPPLEMENTARY INFORMATION

### Strongly reduced lattice thermal conductivity in Sn-doped rare-earth (M) filled skutterudites $M_xCo_4Sb_{12-y}Sn_y$ , promoted by Sb-Sn disordering and phase segregation

*J. Gainza,<sup>a,\*</sup> F. Serrano-Sánchez,<sup>a</sup> N. M. Nemes,<sup>a,b</sup> O. J. Dura,<sup>c</sup> J.L. Martínez,<sup>a</sup> F. Fauth,<sup>d</sup> J.A. Alonso<sup>a</sup>*

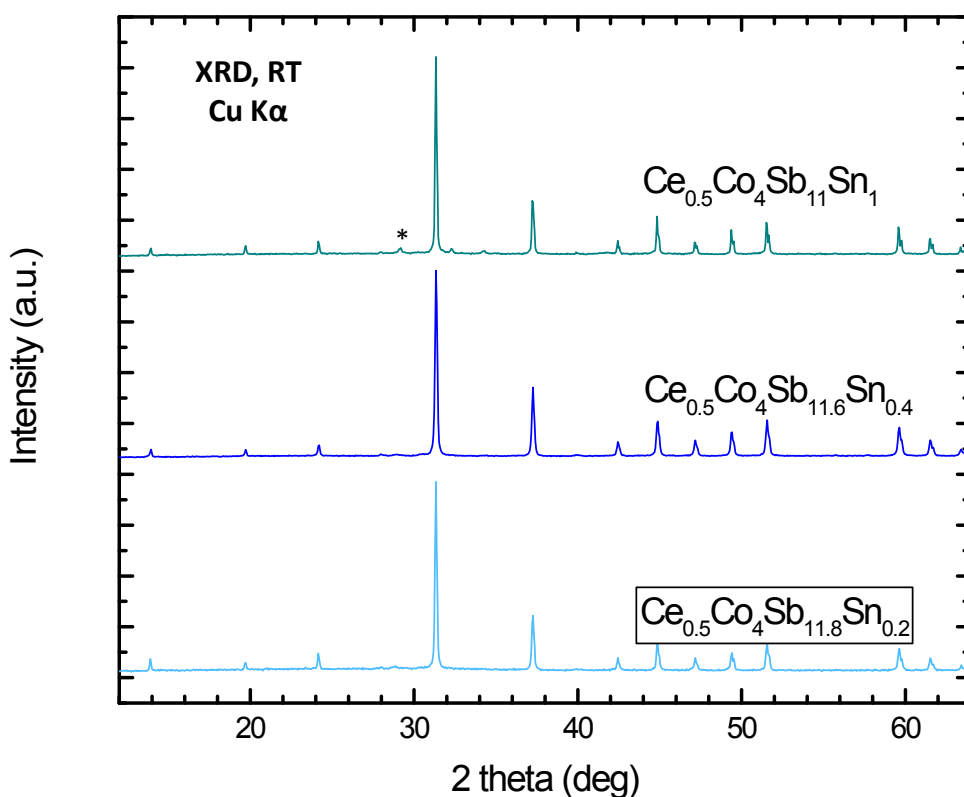

**Figure S1.** Laboratory XRD patterns of as-grown  $Ce_{0.5}Co_4Sb_{12-y}Sb_y$  ( $y = 0.2, 0.4, 1.0$ ) at room temperature. The star corresponds to the most intense reflection of Sb impurity.

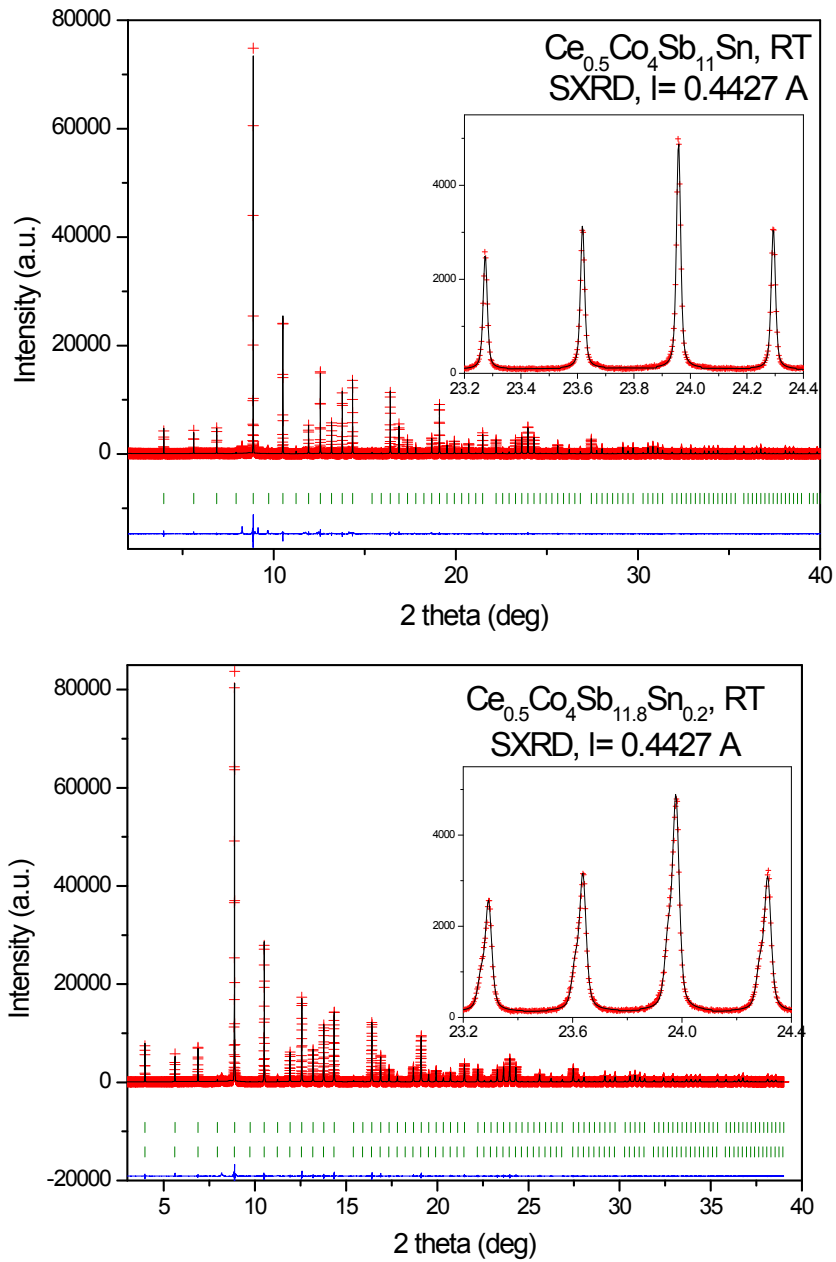

**Figure S2.** Observed (red crosses), calculated (black full line) and their difference (blue line), SXR profiles for  $\text{Ce}_{0.5}\text{Co}_4\text{Sb}_{12-y}\text{Sn}_y$  ( $y = 0.2, 1$ ) at 295 K, with the peak splitting highlighted in the Insets. For  $x = 0.2$ , the two series of Bragg reflections correspond to the two coexistent skutterudite phases.

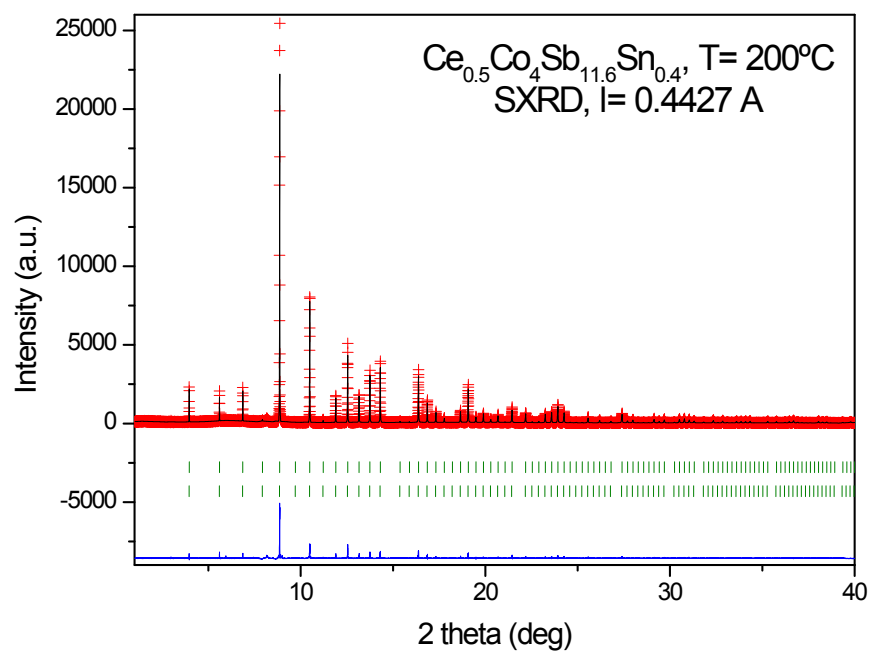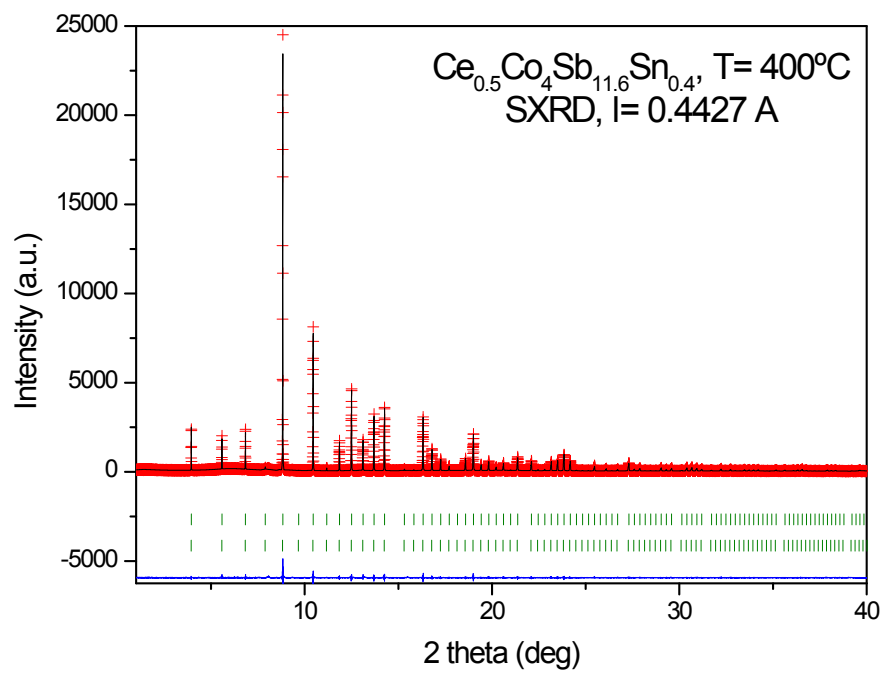

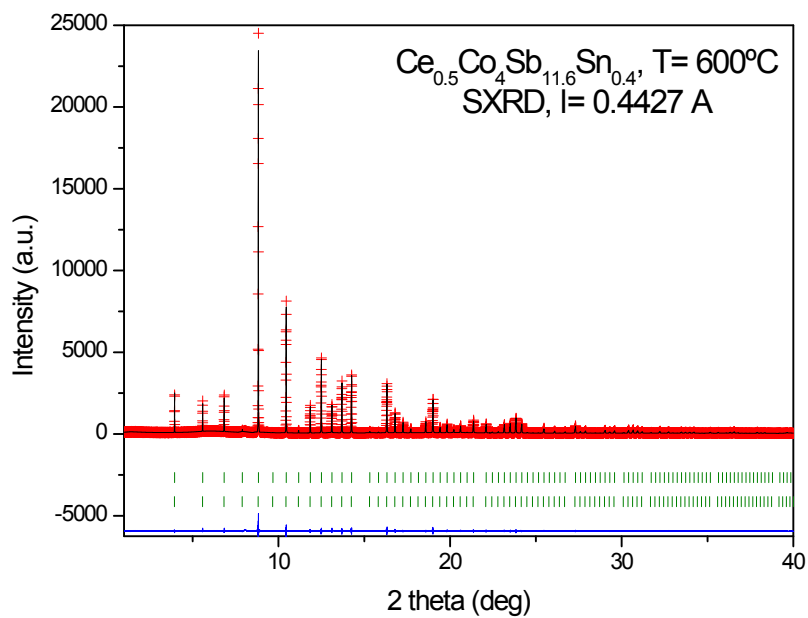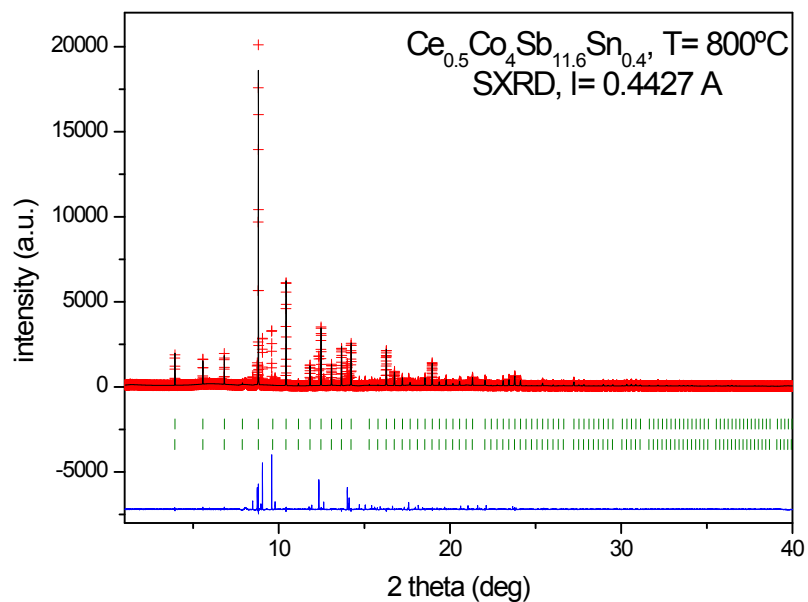

**Figure S3.** Observed (red crosses), calculated (black full line) and their difference (blue line), SXR D profiles for  $\text{Ce}_{0.5}\text{Co}_4\text{Sb}_{11.6}\text{Sn}_{0.4}$  at 200, 400, 600 and 800°C. The two series of Bragg reflections correspond to the two coexistent skutterudite phases. At 800°C, the incipient decomposition of the skutterudite phase is observed.

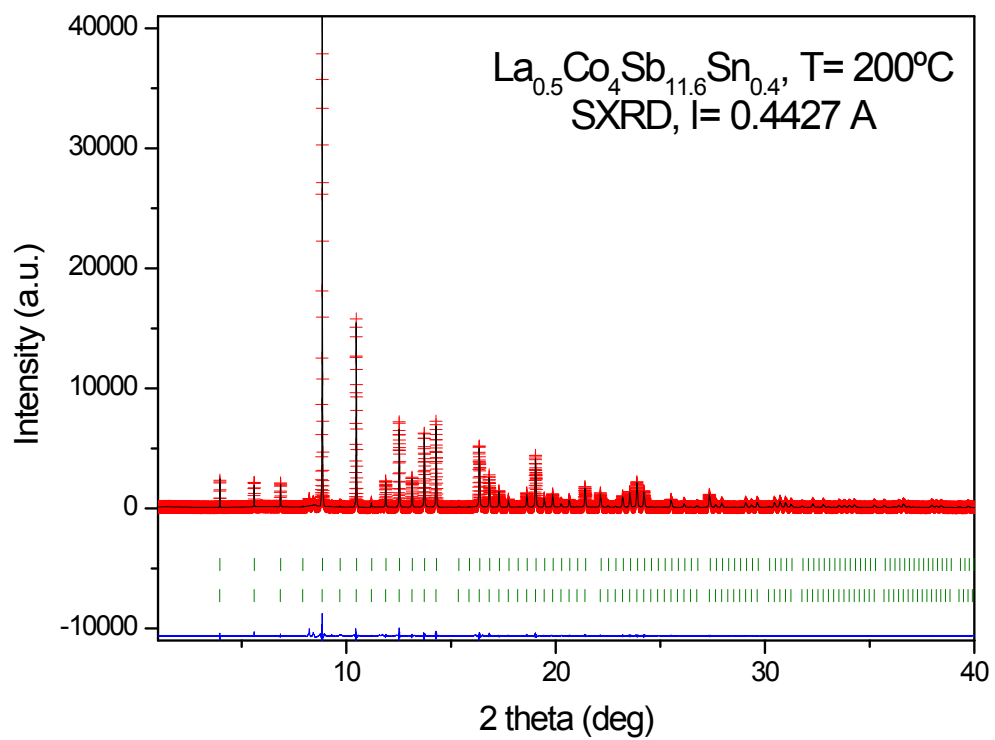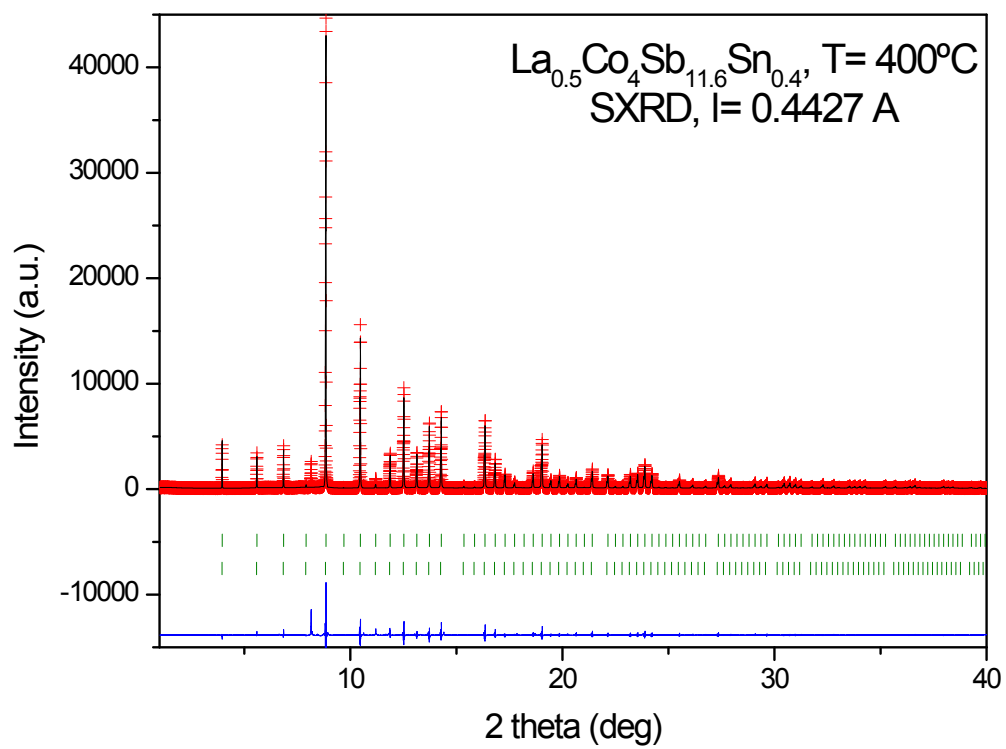

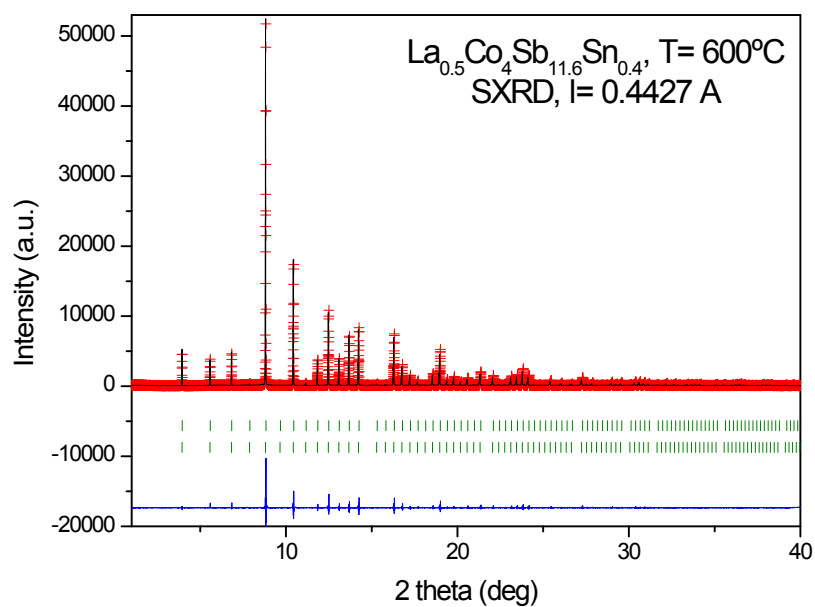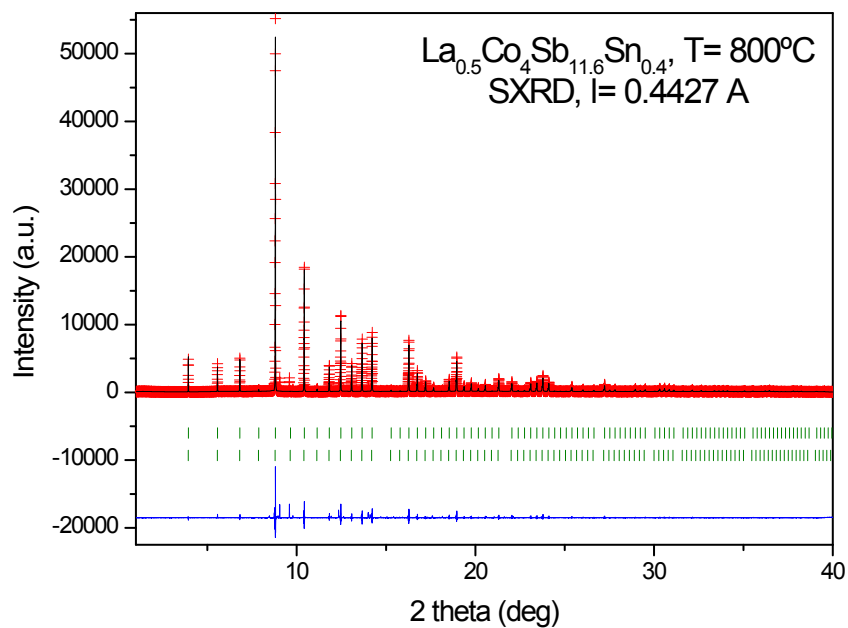

**Figure S4.** Observed (red crosses), calculated (black full line) and their difference (blue line), SXR D profiles for  $\text{La}_{0.5}\text{Co}_4\text{Sb}_{11.6}\text{Sn}_{0.4}$  at 200, 400, 600 and 800°C. The two series of Bragg reflections correspond to the two coexistent skutterudite phases. At 800°C, the incipient decomposition of the skutterudite phase is observed.

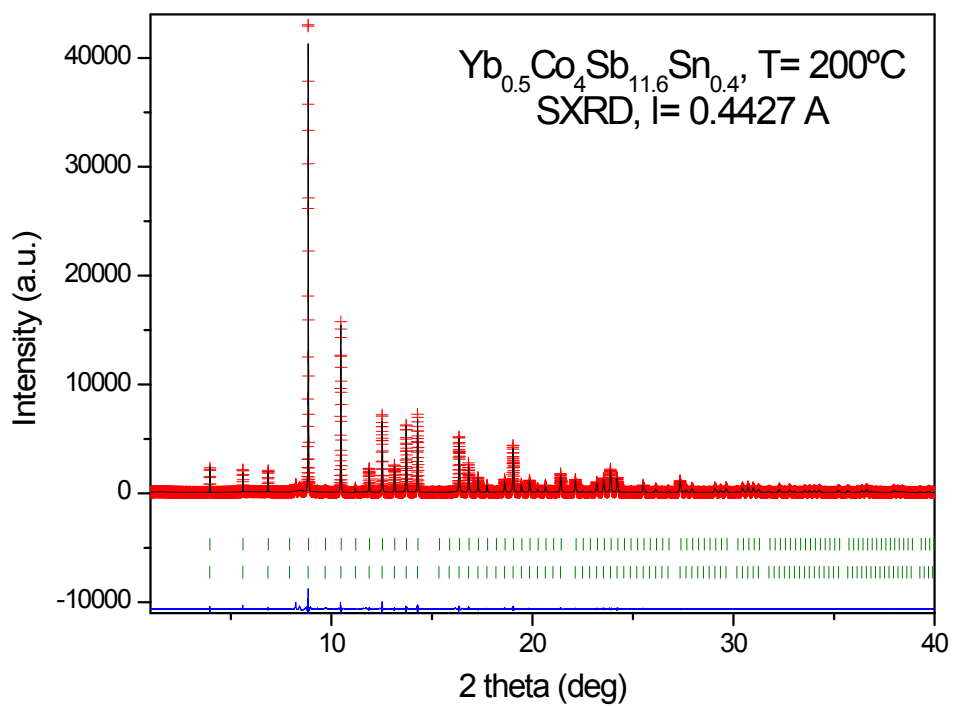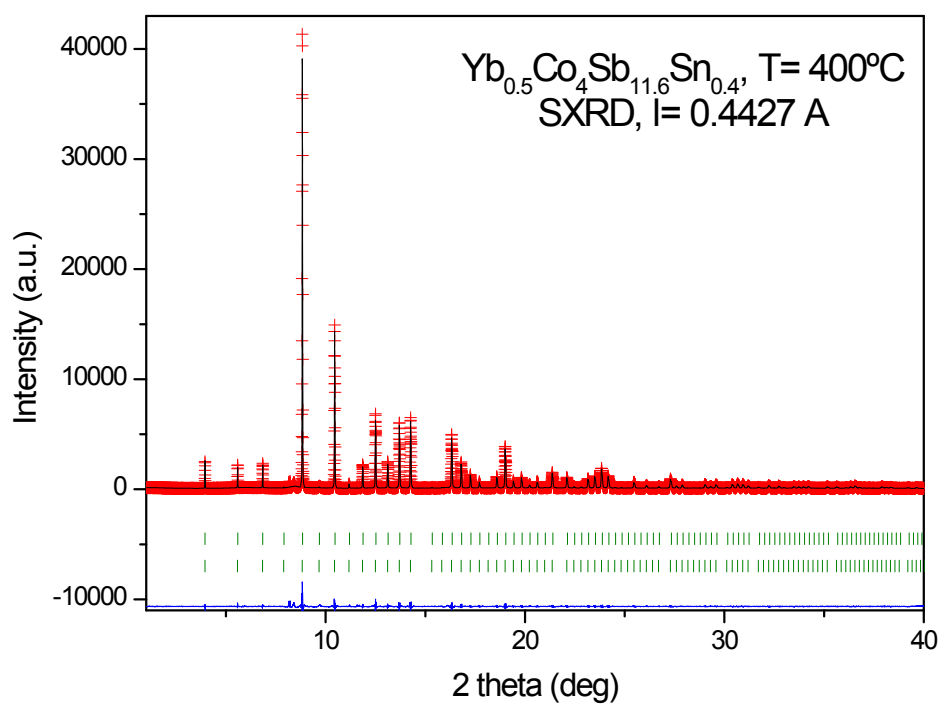

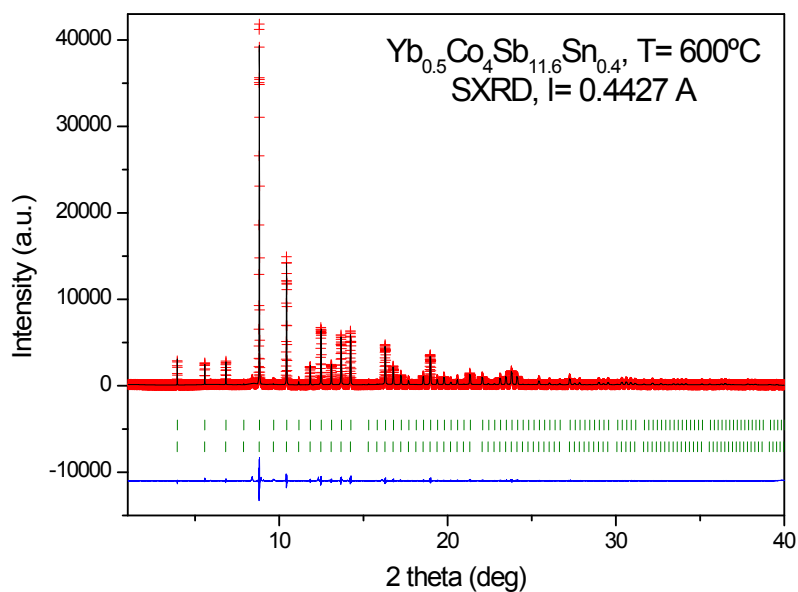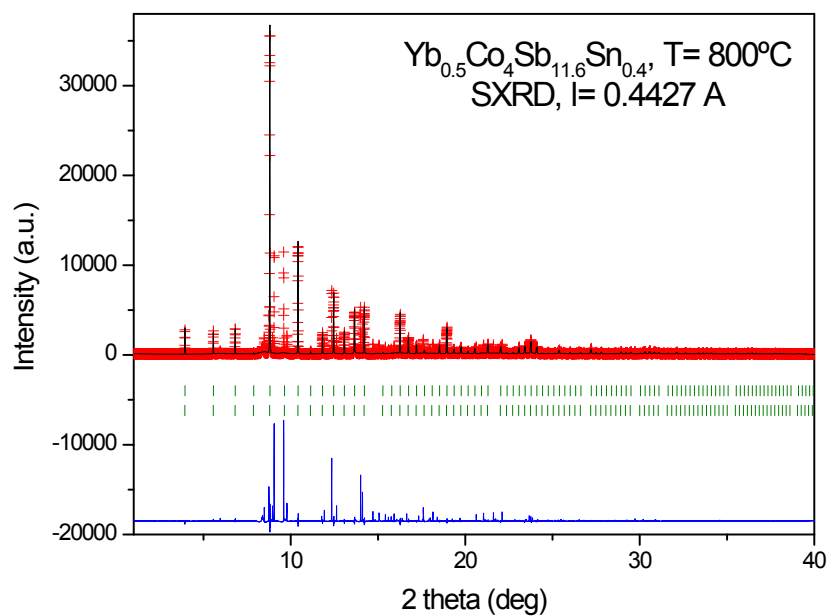

**Figure S5.** Observed (red crosses), calculated (black full line) and their difference (blue line), SXR D profiles for  $\text{Yb}_{0.5}\text{Co}_4\text{Sb}_{11.6}\text{Sn}_{0.4}$  at 200, 400, 600 and 800°C. The two series of Bragg reflections correspond to the two coexistent skutterudite phases. At 800°C, the incipient decomposition of the skutterudite phase is observed.



**Table S1.** Refined structural parameters of  $\text{Ce}_{0.5}\text{Co}_4\text{Sb}_{12-y}\text{Sn}_y$  ( $y = 0.2, 1.0$ ) at room temperature from SXR D data. Space group:  $Im\bar{3}$ .

| Nominal Composition                                                                                | $\text{Ce}_{0.5}\text{Co}_4\text{Sb}_{11.8}\text{Sn}_{0.2}$  |                                                              | $\text{Ce}_{0.5}\text{Co}_4\text{Sb}_{11.0}\text{Sn}_{1.0}$  |
|----------------------------------------------------------------------------------------------------|--------------------------------------------------------------|--------------------------------------------------------------|--------------------------------------------------------------|
| Refined Composition                                                                                | $\text{Ce}_{0.07}\text{Co}_4\text{Sb}_{11.8}\text{Sn}_{0.2}$ | $\text{Ce}_{0.17}\text{Co}_4\text{Sb}_{11.8}\text{Sn}_{0.2}$ | $\text{Ce}_{0.16}\text{Co}_4\text{Sb}_{11.0}\text{Sn}_{1.0}$ |
| Phase abundance (%)                                                                                | 77.6(3)                                                      | 22.4(2)                                                      | 100%                                                         |
| Lattice parameter (Å)                                                                              | 9.04203(3)                                                   | 9.05289(4)                                                   | 9.04933(2)                                                   |
| Volume (Å <sup>3</sup> )                                                                           | 739.260(4)                                                   | 741.928(6)                                                   | 741.05(1)                                                    |
| $U_{11}$ (Co) / Å <sup>2</sup> *                                                                   | 0.0052(3)                                                    |                                                              | 0.0050(3)                                                    |
| $U_{12}$ (Co) / Å <sup>2</sup> **                                                                  | 0.0000(4)                                                    |                                                              | 0.0004(5)                                                    |
| $y$ (Sb)                                                                                           | 0.33506(6)                                                   | 0.3354(2)                                                    | 0.33523(7)                                                   |
| $z$ (Sb)                                                                                           | 0.15793(6)                                                   | 0.1591(2)                                                    | 0.15827(7)                                                   |
| Occ. R (<1)                                                                                        | 0.065(3)                                                     | 0.17(1)                                                      | 0.157(5)                                                     |
| $U_{11}$ (Sb) / Å <sup>2</sup> ***                                                                 | 0.0070(3)                                                    |                                                              | 0.0074(3)                                                    |
| $U_{22}$ (Sb) / Å <sup>2</sup>                                                                     | 0.0118(4)                                                    |                                                              | 0.0109(4)                                                    |
| $U_{33}$ (Sb) / Å <sup>2</sup>                                                                     | 0.0087(4)                                                    |                                                              | 0.0081(4)                                                    |
| $U_{23}$ (Sb) / Å <sup>2</sup>                                                                     | 0.0006(2)                                                    |                                                              | 0.0011(3)                                                    |
| $U_{11}$ (R) / Å <sup>2</sup> ****                                                                 | 0.031(6)                                                     |                                                              | 0.054(7)                                                     |
| $d$ Co-Sb (Å)                                                                                      | 2.5287(3)                                                    | 2.5292(7)                                                    | 2.5302(3)                                                    |
| $d_1$ Sb-Sb (Å)                                                                                    | 2.8560(9)                                                    | 2.881(2)                                                     | 2.8645(9)                                                    |
| $d_2$ Sb-Sb (Å)                                                                                    | 2.9828(9)                                                    | 2.980(2)                                                     | 2.9821(9)                                                    |
| $R_p$ (%)                                                                                          | 5.98                                                         |                                                              | 10.584                                                       |
| $R_{wp}$ (%)                                                                                       | 7.67                                                         |                                                              | 18.623                                                       |
| $R_{exp}$ (%)                                                                                      | 4.08                                                         |                                                              | 5.942                                                        |
| $R_{Bragg}$ (%)                                                                                    | 1.36                                                         | 2.99                                                         | 1.937                                                        |
| $\chi^2$ (%)                                                                                       | 3.54                                                         |                                                              | 4.15                                                         |
| Sb at 24g, (0,y,z); Co at 8c (1/4,1/4,1/4); R at 2a (0,0,0)                                        |                                                              |                                                              |                                                              |
| Anisotropic U                                                                                      |                                                              |                                                              |                                                              |
| Co: * $U_{11} = U_{22} = U_{33}$ ; ** $U_{12} = U_{23} = U_{13}$ ; Sb: *** $U_{12} = U_{13} = 0$ ; |                                                              |                                                              |                                                              |
| R: **** $U_{11} = U_{22} = U_{33}$                                                                 |                                                              |                                                              |                                                              |

**Table S2.** Estimated carrier density calculated for each composition, using the Single Parabolic Band approximation, from the measured Seebeck coefficient. These values are not obtained from Hall effect measurements, but from the experimental Seebeck coefficient.

We have considered two different effective masses in the calculation,  $1.5m_e$  and  $1.7m_e$ , common reported values in skutterudites.

| <b>Composition</b>                                          | <b>Carrier density (<math>10^{20} \text{ cm}^{-3}</math>)</b> |
|-------------------------------------------------------------|---------------------------------------------------------------|
| $\text{La}_{0.5}\text{Co}_4\text{Sb}_{11.6}\text{Sn}_{0.4}$ | 2.13 – 2.57                                                   |
| $\text{Ce}_{0.5}\text{Co}_4\text{Sb}_{11.6}\text{Sn}_{0.4}$ | 1.98 – 2.39                                                   |
| $\text{Yb}_{0.5}\text{Co}_4\text{Sb}_{11.6}\text{Sn}_{0.4}$ | 1.77 – 2.14                                                   |
|                                                             |                                                               |
| $\text{La}_{0.5}\text{Co}_4\text{Sb}_{12}$                  | 6.07 – 7.33                                                   |
| $\text{Ce}_{0.5}\text{Co}_4\text{Sb}_{12}$                  | 0.62 – 0.74                                                   |
| $\text{Yb}_{0.5}\text{Co}_4\text{Sb}_{12}$                  | 1.77 – 2.14                                                   |

**Table S3.** Refinement of the La occupancy factors from the SXRD data at different temperatures. To create this table, we have repeated the Rietveld refinements with released occupancy factor of the filler in the  $\text{La}_{0.5}\text{Co}_4\text{Sb}_{11.6}\text{Sn}_{0.4}$  compound, although the occupancy factor and the displacement parameters are strongly related, making this analysis difficult.

The refinement of the other high-temperature structures was carried out by fixing the filling factors to those determined at RT, in order to avoid unwanted couplings with the displacement factors.

| <b>Temperature (K)</b> | <b>La occupancy (Phase 1)</b> | <b>La occupancy (Phase 2)</b> |
|------------------------|-------------------------------|-------------------------------|
| 300                    | 0.052(6)                      | 0.33(2)                       |
| 473                    | 0.060(6)                      | 0.36(2)                       |
| 673                    | 0.05(1)                       | 0.35(2)                       |
| 873                    | 0.040(6)                      | 0.34(2)                       |
| 1073                   | 0.054(7)                      | 0.34(2)                       |

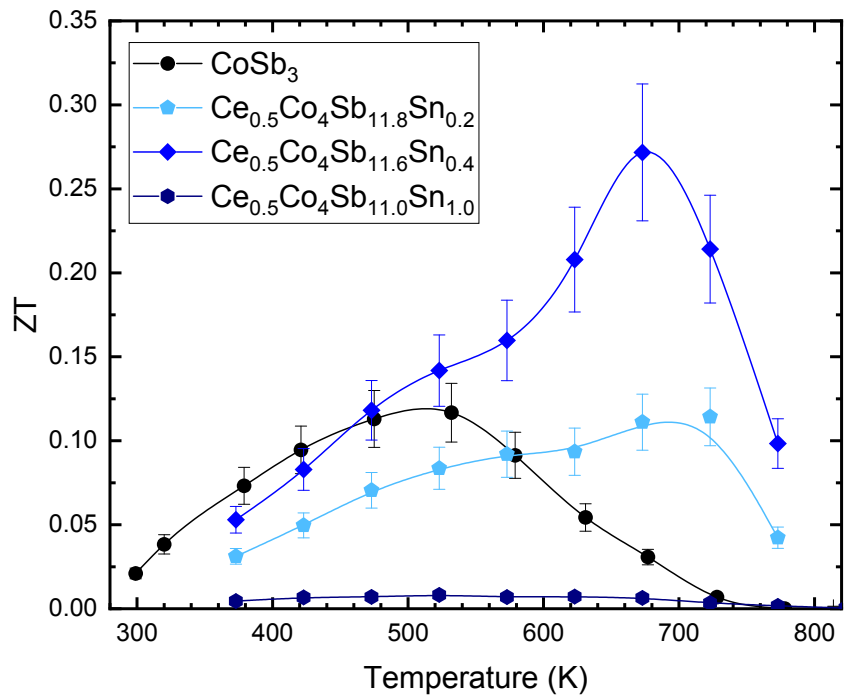

**Figure S6.** Temperature dependence of the figure of merit,  $ZT$ , of  $\text{CoSb}_3$  and three Sn-doped compositions,  $\text{Ce}_{0.5}\text{Co}_4\text{Sb}_{12-y}\text{Sn}_y$ . The error bars are placed considering an error of  $\pm 15\%$ .
